# Supplementary material for: Determination of nitrite and glucose in water and human urine with light-up chromogenic response based on the expeditious oxidation of 3,3′,5,5′-tetramethylbenzidine by peroxynitrous acid
Source: Royal Society of Chemistry journal article supplement (doi:10.1039/c3an00080j), 2013-01-01
Supplement: c3an00080j.pdf [file c3an00080j.pdf]

## Electronic Supplementary Information

Determination of nitrite and glucose in water and human urine with light-up chromogenic response based on the expeditious oxidation of 3,3',5,5'-tetramethylbenzidine by peroxynitrous acid

Jia Zhang, Cheng Yang, Chuanxia Chen and Xiurong Yang\*

\*Correspondence e-mail: [xryang@ciac.jl.cn](mailto:xryang@ciac.jl.cn)

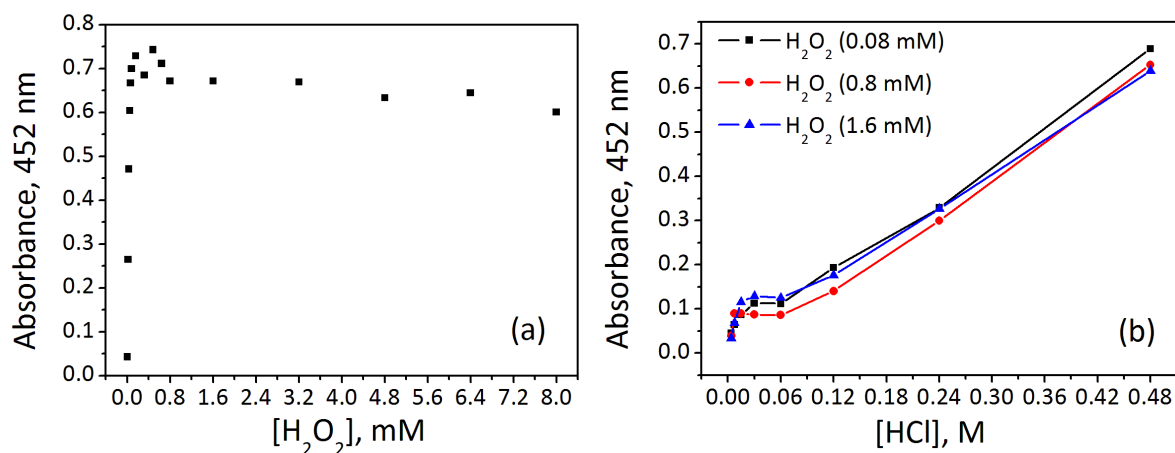

**Fig. S1** Effects of (a) H<sub>2</sub>O<sub>2</sub> and (b) HCl concentration on the oxidation of TMB (25 μM). For (a), the HCl concentration was 0.48 M, and for (a) and (b), the NO<sub>2</sub><sup>-</sup> concentration was both 10 μM.

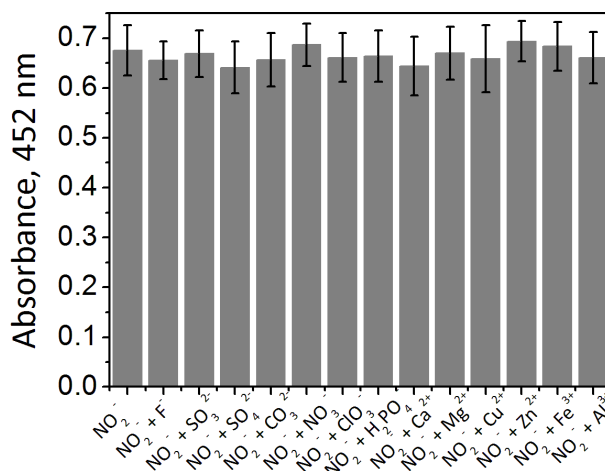

**Fig. S2** Interference study of the TMB-H<sub>2</sub>O<sub>2</sub> system by the addition of a mixture of nitrite and another ion. NO<sub>2</sub><sup>-</sup>: 10 μM, other anions: 1 mM, Ca<sup>2+</sup>: 1 mM, and other cations: 0.1 mM.

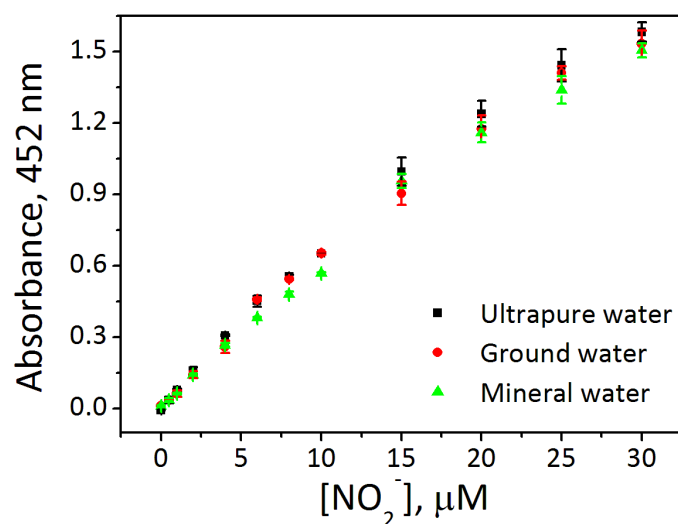

**Fig. S3** The calibration curves for the nitrite assay in three water samples. The error bar represents the standard deviation of three measurements.

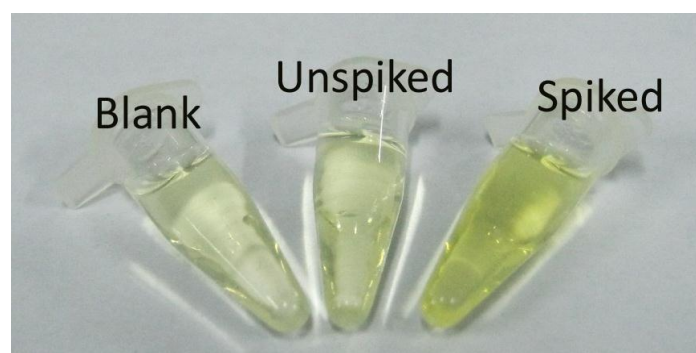

**Fig. S4** Photographs for the determination of glucose in human urine.

**Table S1** Results for the determination of nitrite in real samples.

| Real samples                    | Detected/ $\mu\text{M}$ | Spiked/ $\mu\text{M}$ | Recovery/% | RSD/% |
|---------------------------------|-------------------------|-----------------------|------------|-------|
| <i>Ground water</i>             | No detection            | 4                     | 95-103     | < 5   |
|                                 |                         | 8                     |            |       |
| <i>Household tap water</i>      | No detection            | 4                     | 95-103     | < 5   |
|                                 |                         | 8                     |            |       |
| <i>Commercial mineral water</i> | No detection            | 4                     | 95-103     | < 5   |
|                                 |                         | 8                     |            |       |
| <i>Human urine</i>              | No detection            | 4                     | 95-103     | < 5   |
|                                 |                         | 8                     |            |       |

All data are based on three measurements.
